# Supplementary material
Source: publisher figshare collection journal article supplement (https://acs.figshare.com/ndownloader/files/5726292)
Supplement: Supplementary file 1 [file 5726292]

## SUPPORTING INFORMATION

### **Ag<sub>5</sub>PV<sub>2</sub>Mo<sub>10</sub>O<sub>40</sub>, a Heterogeneous Catalyst for Air-Based Selective Oxidation at Ambient Temperature**

Jeffrey T. Rhule, Wade A. Neiwert, Kenneth I. Hardcastle, Bao T. Do and Craig L. Hill

*Department of Chemistry, Emory University, Atlanta, GA 30322*

**Table S1.** Crystal Data and Structure Refinement for Ag<sub>10.4</sub>P<sub>2</sub>V<sub>4</sub>Mo<sub>20</sub>O<sub>80</sub>(NO<sub>3</sub>)<sub>0.4</sub>•(MeCN)<sub>17.3</sub>(H<sub>2</sub>O)<sub>1.5</sub>

**Table S2.** Selected Bond Lengths (Å) and Angles (deg.) for Ag<sub>5</sub>**1**.

**Table S3.** Anisotropic displacement parameters (Å<sup>2</sup> × 10<sup>3</sup>) for Ag<sub>5</sub>**1**. The anisotropic displacement factor exponent takes the form:  $-2\pi^2 [h^2 a^{*2} U^{11} + \dots + 2 h k a^* b^* U^{12}]$

**Table S4.** Atomic coordinates (× 10<sup>4</sup>) and equivalent isotropic displacement parameters (Å<sup>2</sup> × 10<sup>3</sup>) for Ag<sub>5</sub>**1**. U(eq) is defined as one third of the trace of the orthogonalized U<sup>ij</sup> tensor.

**Table S5.** Ambient-Temperature Air Oxidation of CEES in 2,2,2-Trifluoroethanol Catalyzed by Selected Materials.

**Figure S1.** Continued oxidation of CEES to CEESO after isolation and resuspension of the heterogeneous catalyst, Ag<sub>5</sub>**1**.

**Figure S2.** Reaction profile for the ambient-temperature air oxidation of CEES (○) to CEESO catalyzed by Ag<sub>5</sub>**1** in 2,2,2-trifluoroethanol and its inhibition by added DMSO (■).

**Figure S3.** Adsorption of CEES onto the solid catalyst Ag<sub>5</sub>**1**. Concentrations of CEES (CH<sub>3</sub>CH<sub>2</sub>SCH<sub>2</sub>CH<sub>2</sub>Cl; ●) and the hydrolysis product (CH<sub>3</sub>CH<sub>2</sub>SCH<sub>2</sub>CH<sub>2</sub>OH; ■) are plotted versus time. After 8.4 hours, 5.26 × 10<sup>-5</sup> mols of CEES was absorbed onto 3.53 × 10<sup>-5</sup> mols of catalyst. No CEESO was detected.

**Figure S4.** Comparison of <sup>31</sup>P Solid State NMR of Ag<sub>5</sub>**1** before and after catalysis as evidence for bound CEESO.

Detailed experimental section including calculation of surface accessible Ag<sub>5</sub>**1** in the Ag<sub>5</sub>**1** powder.

**Table S1.** Crystal Data and Structure Refinement for  $\text{Ag}_{10.4}\text{P}_2\text{V}_4\text{Mo}_{20}\text{O}_{80}(\text{NO}_3)_{0.4} \cdot (\text{MeCN})_{17.3}(\text{H}_2\text{O})_{1.5} (\text{Ag}_5\text{I})$ Empirical formula  $\text{C}_{34.6}\text{Ag}_{10.4}\text{Mo}_{20}\text{N}_{17.7}\text{O}_{82.7}\text{P}_2\text{V}_4$ 

Formula weight 5293.07

Temperature 100(2) K

Wavelength 0.71073 Å

Crystal system Triclinic

Space group P-1

Unit cell dimensions  $a = 13.038(5)$  Å $b = 21.175(8)$  Å $c = 22.353(8)$  Å $\alpha = 85.966(7)^\circ$  $\beta = 83.556(7)^\circ$  $\gamma = 77.854(7)^\circ$ Volume  $5988(4)$  Å<sup>3</sup>

Z 2

Density (calculated)  $2.936 \text{ Mg/m}^3$ Absorption coefficient  $4.093 \text{ mm}^{-1}$ 

F(000) 4888

Theta range for data collection  $1.61$  to  $30.69^\circ$ .

Reflections collected 71417

Independent reflections 36109 [R(int) = 0.1276]

Completeness to theta =  $30.69^\circ$  97.2 %

Absorption correction Empirical

Goodness-of-fit on  $F^2$  1.032Final R indices [I > 2 sigma (I)]  $R_1 = 0.0937$ ,  $wR_2 = 0.1731$

**Table S2.** Selected Bond Lengths (Å) and Angles (deg.) for Ag<sub>5</sub>I.

|                   |           |                  |           |
|-------------------|-----------|------------------|-----------|
| Ag1 – O31         | 2.437(9)  | Ag5 – N12S       | 2.202(13) |
| Ag1 – O37         | 2.590(9)  | Ag6 – N3S        | 2.186(12) |
| Ag1 – N1S         | 2.200(13) | Ag6 – N8S        | 2.332(15) |
| Ag1 – N10S        | 2.258(17) | Ag6 – N9S        | 2.182(13) |
| Ag2 – N13S        | 2.196(13) | Ag7 – O19        | 2.475(9)  |
| Ag2 – N14S        | 2.154(13) | Ag7 – O29        | 2.447(9)  |
| Ag2 – N16S        | 2.625(14) | Ag7 – N5S        | 2.222(13) |
| Ag3 – O6          | 2.503(9)  | Ag8 – O64        | 2.560(9)  |
| Ag3 – O12         | 2.493(9)  | Ag8 – O76        | 2.459(10) |
| Ag3 – N6S         | 2.198(13) | Ag8 – O40        | 2.404(9)  |
| Ag3 – N11S        | 2.289(13) | Ag8 – N15S       | 2.182(14) |
| Ag4 – O62         | 2.534(10) | Ag8 – O64        | 2.560(9)  |
| Ag4 – N2S         | 2.307(13) | Ag8 – O76        | 2.459(10) |
| Ag4 – N7S         | 2.230(14) | Ag8 – O40        | 2.404(9)  |
| Ag5 – O80         | 2.447(9)  | Ag8 – N15S       | 2.182(13) |
| Ag5 – N4S         | 2.280(15) |                  |           |
| N1S – Ag1 – N10S  | 115.2(5)  | N9S – Ag6 – N8S  | 116.0(5)  |
| N1S – Ag1 – O31   | 130.8(4)  | N4S – Ag5 – O80  | 104.7(4)  |
| N10S – Ag1 – O31  | 104.8(5)  | N9S – Ag6 – N3S  | 146.3(5)  |
| N1S – Ag1 – O37   | 125.8(4)  | N9S – Ag6 – N8S  | 116.0(5)  |
| N10S – Ag1 – O37  | 106.2(5)  | N7S – Ag4 – N2S  | 110.8(5)  |
| O31 – Ag1 – O37   | 62.7(3)   | N7S – Ag4 – O62  | 142.0(4)  |
| N14S – Ag2 – N13S | 158.2(5)  | N2S – Ag4 – O62  | 94.3(4)   |
| N14S – Ag2 – N16S | 98.5(5)   | N12S – Ag5 – N4S | 114.6(5)  |
| N13S – Ag2 – N16S | 102.7(5)  | N12S – Ag5 – O80 | 134.2(4)  |
| N6S – Ag3 – N11S  | 114.4(5)  | N4S – Ag5 – O80  | 104.7(4)  |
| N6S – Ag3 – O12   | 125.7(4)  | N9S – Ag6 – N3S  | 146.3(5)  |
| N11S – Ag3 – O12  | 110.6(4)  | N9S – Ag6 – N8S  | 116.0(5)  |

|                  |          |                  |          |
|------------------|----------|------------------|----------|
| N6S – Ag3 – O6   | 131.9(4) | N3S – Ag6 – N8S  | 97.2(5)  |
| N11S – Ag3 – O6  | 100.8(4) | N5S – Ag7 – O29  | 126.6(4) |
| O12 – Ag3 – O6   | 62.9(3)  | N5S – Ag7 – O19  | 145.3(4) |
| N7S – Ag4 – N2S  | 110.8(5) | O29 – Ag7 – O19  | 64.9(3)  |
| N7S – Ag4 – O62  | 142.0(4) | N15S – Ag8 – O40 | 113.7(4) |
| N2S – Ag4 – O62  | 94.3(4)  | N15S – Ag8 – O76 | 137.7(4) |
| N12S – Ag5 – N4S | 114.6(5) | O40 – Ag8 – O76  | 79.8(3)  |
| N12S – Ag5 – O80 | 134.2(4) | N15S – Ag8 – O64 | 147.2(4) |
| N4S – Ag5 – O80  | 104.7(4) | O40 – Ag8 – O64  | 92.3(3)  |
| N9S – Ag6 – N3S  | 146.3(5) | O76 – Ag8 – O64  | 63.7(3)  |

---

**Table S3.** Anisotropic displacement parameters ( $\text{\AA}^2 \times 10^3$ ) for Ag<sub>5</sub>1. The anisotropic displacement factor exponent takes the form:  $-2\pi^2 [h^2 a^{*2} U^{11} + \dots + 2 h k a^* b^* U^{12}]$

|        | U <sup>11</sup> | U <sup>22</sup> | U <sup>33</sup> | U <sup>23</sup> | U <sup>13</sup> | U <sup>12</sup> |
|--------|-----------------|-----------------|-----------------|-----------------|-----------------|-----------------|
| Mo(1)  | 16(1)           | 5(1)            | 17(2)           | -3(1)           | -5(1)           | -2(1)           |
| Mo(2)  | 14(1)           | 6(1)            | 21(1)           | 2(1)            | -7(1)           | 2(1)            |
| Mo(3)  | 14(1)           | 14(1)           | 17(1)           | -5(1)           | 2(1)            | -1(1)           |
| Mo(4)  | 14(1)           | 7(1)            | 20(1)           | -3(1)           | 0(1)            | -2(1)           |
| Mo(5)  | 8(1)            | 5(1)            | 21(1)           | -3(1)           | 0(1)            | 1(1)            |
| Mo(6)  | 15(1)           | 8(1)            | 13(1)           | 1(1)            | -3(1)           | -1(1)           |
| Mo(7)  | 10(1)           | 10(1)           | 20(1)           | 0(1)            | 5(1)            | -3(1)           |
| Mo(8)  | 14(1)           | 6(1)            | 26(1)           | -2(1)           | -2(1)           | 3(1)            |
| Mo(9)  | 22(1)           | 5(1)            | 20(2)           | 2(1)            | -7(1)           | -4(1)           |
| Mo(10) | 13(1)           | 10(1)           | 21(1)           | -4(1)           | 0(1)            | -5(1)           |
| Mo(11) | 14(1)           | 9(1)            | 17(1)           | -3(1)           | -4(1)           | -2(1)           |
| Mo(12) | 24(1)           | 8(1)            | 16(1)           | 0(1)            | -7(1)           | -2(1)           |
| Mo(13) | 16(1)           | 15(1)           | 18(1)           | -3(1)           | -5(1)           | 2(1)            |
| Mo(14) | 13(1)           | 9(1)            | 15(1)           | -1(1)           | -3(1)           | 2(1)            |
| Mo(15) | 13(1)           | 9(1)            | 21(1)           | 3(1)            | -2(1)           | -5(1)           |
| Mo(16) | 19(1)           | 7(1)            | 19(1)           | -4(1)           | -4(1)           | -2(1)           |
| Mo(17) | 19(1)           | 7(1)            | 22(1)           | 3(1)            | -6(1)           | 0(1)            |
| Mo(18) | 14(1)           | 10(1)           | 16(2)           | 2(1)            | -4(1)           | 0(1)            |
| Mo(19) | 11(1)           | 9(1)            | 20(1)           | -2(1)           | -2(1)           | -3(1)           |
| Mo(20) | 18(1)           | 5(1)            | 21(1)           | 0(1)            | -2(1)           | -3(1)           |
| Mo(21) | 14(1)           | 10(1)           | 19(1)           | 1(1)            | -7(1)           | -1(1)           |
| Mo(22) | 12(1)           | 8(1)            | 22(1)           | -1(1)           | 1(1)            | -2(1)           |
| Mo(23) | 12(1)           | 11(1)           | 18(1)           | -2(1)           | 0(1)            | -1(1)           |
| Mo(24) | 13(1)           | 6(1)            | 15(1)           | 0(1)            | -4(1)           | 0(1)            |
| Ag(1)  | 24(1)           | 22(1)           | 48(1)           | -4(1)           | -14(1)          | 3(1)            |
| Ag(2)  | 20(1)           | 18(1)           | 38(1)           | 1(1)            | 0(1)            | 5(1)            |
| Ag(3)  | 19(1)           | 15(1)           | 43(1)           | -7(1)           | -7(1)           | 0(1)            |
| Ag(4)  | 18(1)           | 21(1)           | 54(1)           | 1(1)            | -6(1)           | -2(1)           |

|        |       |       |       |        |        |        |
|--------|-------|-------|-------|--------|--------|--------|
| Ag(5)  | 23(1) | 19(1) | 44(1) | 2(1)   | -13(1) | 1(1)   |
| Ag(6)  | 24(1) | 15(1) | 39(1) | -2(1)  | -6(1)  | 1(1)   |
| Ag(7)  | 44(1) | 10(1) | 41(1) | -2(1)  | -16(1) | -5(1)  |
| Ag(8)  | 49(1) | 16(1) | 36(1) | -7(1)  | 2(1)   | -6(1)  |
| Ag(1D) | 72(2) | 26(1) | 62(2) | -1(1)  | -6(2)  | -17(1) |
| Ag(2D) | 68(2) | 27(1) | 51(2) | -6(1)  | -9(1)  | -8(1)  |
| Ag(3D) | 58(2) | 36(2) | 83(2) | -9(2)  | -21(2) | -10(1) |
| Ag(4D) | 75(2) | 34(2) | 75(2) | -16(2) | -16(2) | 9(2)   |

---

**Table S4.** Atomic coordinates ( $\times 10^4$ ) and equivalent isotropic displacement parameters ( $\text{\AA}^2 \times 10^3$ ) for Ag<sub>5</sub>I. U(eq) is defined as one third of the trace of the orthogonalized  $U^{ij}$  tensor.

|        | x         | y        | z        | U(eq) |
|--------|-----------|----------|----------|-------|
| Mo(1)  | 9920(3)   | 247(2)   | 1783(1)  | 12(1) |
| Mo(2)  | 9849(2)   | 1740(2)  | 1106(2)  | 14(1) |
| Mo(3)  | 12148(2)  | 643(2)   | 1097(1)  | 16(1) |
| Mo(4)  | 8745(3)   | 975(2)   | 3211(2)  | 14(1) |
| Mo(5)  | 8652(2)   | 2479(2)  | 2551(2)  | 12(1) |
| Mo(6)  | 11094(2)  | 2894(1)  | 1750(1)  | 12(1) |
| Mo(7)  | 13409(2)  | 1805(1)  | 1731(1)  | 14(1) |
| Mo(8)  | 13456(2)  | 175(2)   | 2460(2)  | 16(1) |
| Mo(9)  | 11281(2)  | -232(1)  | 3197(1)  | 15(1) |
| Mo(10) | 9871(1)   | 2040(1)  | 3834(1)  | 14(1) |
| Mo(11) | 12323(2)  | 2485(1)  | 3038(1)  | 13(1) |
| Mo(12) | 12411(3)  | 856(2)   | 3782(2)  | 16(1) |
| Mo(13) | 5307(2)   | 6837(1)  | 3930(1)  | 17(1) |
| Mo(14) | 4002(2)   | 7353(1)  | 2690(1)  | 13(1) |
| Mo(15) | 4164(2)   | 5807(1)  | 3274(1)  | 14(1) |
| Mo(16) | 7665(2)   | 7353(1)  | 3158(1)  | 15(1) |
| Mo(17) | 6341(2)   | 7861(1)  | 1937(1)  | 16(1) |
| Mo(18) | 5127(3)   | 6752(2)  | 1190(1)  | 14(1) |
| Mo(19) | 5277(2)   | 5205(1)  | 1758(1)  | 13(1) |
| Mo(20) | 6698(3)   | 4645(1)  | 3119(2)  | 15(1) |
| Mo(21) | 7858(2)   | 5691(2)  | 3774(2)  | 14(1) |
| Mo(22) | 8682(3)   | 6820(2)  | 1751(2)  | 14(1) |
| Mo(23) | 7439(2)   | 5676(2)  | 1064(2)  | 14(1) |
| Mo(24) | 8891(2)   | 5138(1)  | 2413(1)  | 11(1) |
| V(1)   | 9950(30)  | 239(19)  | 1877(16) | 10    |
| V(2)   | 10000(30) | 1751(19) | 1079(19) | 10    |
| V(3)   | 12290(30) | 651(18)  | 1019(16) | 10    |
| V(4)   | 8860(30)  | 928(19)  | 3236(19) | 10    |

|       |           |          |          |       |
|-------|-----------|----------|----------|-------|
| V(5)  | 8830(20)  | 2482(17) | 2510(16) | 10    |
| V(6)  | 11140(20) | 2883(12) | 1920(10) | 10    |
| V(7)  | 13580(20) | 1810(15) | 1641(14) | 10    |
| V(8)  | 13600(30) | 178(19)  | 2400(18) | 10    |
| V(9)  | 11190(30) | -222(17) | 3090(14) | 10    |
| V(10) | 10125(18) | 2047(14) | 3812(13) | 10    |
| V(11) | 12380(20) | 2452(16) | 3165(13) | 10    |
| V(12) | 12410(30) | 830(20)  | 3714(19) | 10    |
| V(13) | 5120(20)  | 6869(14) | 3843(13) | 10    |
| V(14) | 3910(20)  | 7362(15) | 2559(12) | 10    |
| V(15) | 4070(20)  | 5866(16) | 3168(14) | 10    |
| V(16) | 7570(30)  | 7403(16) | 3052(14) | 10    |
| V(17) | 6230(20)  | 7919(13) | 1802(11) | 10    |
| V(18) | 5110(30)  | 6766(18) | 1079(15) | 10    |
| V(19) | 5110(20)  | 5219(15) | 1865(13) | 10    |
| V(20) | 6800(30)  | 4706(17) | 3141(18) | 10    |
| V(21) | 7690(30)  | 5721(18) | 3757(17) | 10    |
| V(22) | 8600(30)  | 6772(19) | 1760(19) | 10    |
| V(23) | 7600(30)  | 5705(18) | 1055(18) | 10    |
| V(24) | 8860(20)  | 5130(15) | 2272(12) | 10    |
| O(1)  | 10864(7)  | 1111(4)  | 1870(4)  | 14(2) |
| O(2)  | 11754(7)  | 788(4)   | 2810(4)  | 12(2) |
| O(3)  | 11715(7)  | 1892(4)  | 2316(4)  | 13(2) |
| O(4)  | 10051(7)  | 1603(5)  | 2850(4)  | 16(2) |
| O(5)  | 9239(8)   | -285(5)  | 1618(5)  | 25(3) |
| O(6)  | 9270(7)   | 1012(5)  | 1279(4)  | 17(2) |
| O(7)  | 9188(7)   | 2118(5)  | 540(4)   | 15(2) |
| O(8)  | 11042(7)  | 1260(4)  | 698(4)   | 13(2) |
| O(9)  | 12859(7)  | 298(5)   | 492(4)   | 17(2) |
| O(10) | 11063(7)  | 124(5)   | 1205(4)  | 15(2) |



|       |          |         |         |       |
|-------|----------|---------|---------|-------|
| O(11) | 10640(8) | -139(5) | 2425(4) | 18(2) |
| O(12) | 8860(7)  | 720(5)  | 2420(4) | 16(2) |
| O(13) | 8970(7)  | 2126(4) | 1818(4) | 12(2) |
| O(14) | 10688(7) | 2386(5) | 1244(4) | 15(2) |
| O(15) | 12815(7) | 1301(4) | 1205(4) | 10(2) |
| O(16) | 12785(7) | 167(4)  | 1725(4) | 13(2) |
| O(17) | 7705(8)  | 708(5)  | 3541(5) | 20(2) |
| O(18) | 8019(7)  | 1851(5) | 2904(4) | 15(2) |
| O(19) | 9868(7)  | 2929(4) | 2259(4) | 14(2) |
| O(20) | 10940(7) | 3612(5) | 1375(4) | 15(2) |
| O(21) | 12597(7) | 2563(5) | 1444(4) | 16(2) |
| O(22) | 14589(7) | 1812(5) | 1344(4) | 16(2) |
| O(23) | 13746(7) | 954(4)  | 2175(4) | 14(2) |
| O(24) | 14594(8) | -343(5) | 2303(4) | 18(2) |
| O(25) | 12593(8) | -451(5) | 2779(4) | 18(2) |
| O(26) | 11010(8) | -942(5) | 3477(5) | 19(2) |
| O(27) | 9859(7)  | 354(4)  | 3413(4) | 14(2) |
| O(28) | 8940(8)  | 1492(5) | 3880(5) | 19(2) |
| O(29) | 9004(7)  | 2652(5) | 3351(4) | 14(2) |
| O(30) | 11800(7) | 3086(4) | 2460(4) | 12(2) |
| O(31) | 13539(7) | 2181(5) | 2453(4) | 16(2) |
| O(32) | 13559(7) | 333(4)  | 3269(4) | 13(2) |
| O(33) | 11763(7) | 85(5)   | 3824(4) | 17(2) |
| O(34) | 9594(7)  | 2373(4) | 4494(4) | 12(2) |
| O(35) | 11064(7) | 2470(5) | 3470(4) | 17(2) |
| O(36) | 12880(8) | 2923(5) | 3446(5) | 19(2) |
| O(37) | 12810(7) | 1600(4) | 3436(4) | 12(2) |
| O(38) | 12923(8) | 751(5)  | 4434(5) | 21(2) |
| O(39) | 11019(7) | 1352(5) | 3975(4) | 15(2) |
| O(40) | 7666(7)  | 3112(5) | 2438(4) | 15(2) |

|       |         |         |         |       |
|-------|---------|---------|---------|-------|
| O(41) | 5439(7) | 6464(4) | 2911(4) | 11(2) |
| O(42) | 7027(7) | 6817(4) | 2377(4) | 11(2) |
| O(43) | 7155(7) | 5675(4) | 2806(4) | 12(2) |
| O(44) | 6167(7) | 6061(4) | 1901(4) | 12(2) |
| O(45) | 5073(8) | 7093(5) | 4626(5) | 24(3) |
| O(46) | 4326(7) | 7420(5) | 3514(4) | 17(2) |
| O(47) | 2923(8) | 7944(5) | 2653(5) | 21(2) |
| O(48) | 3368(7) | 6631(5) | 3026(4) | 16(2) |
| O(49) | 3201(8) | 5438(5) | 3590(5) | 24(3) |
| O(50) | 4451(8) | 6224(5) | 3949(5) | 20(2) |
| O(51) | 6400(8) | 7292(5) | 3586(4) | 18(2) |
| O(52) | 5112(7) | 7808(5) | 2435(4) | 16(2) |
| O(53) | 4178(8) | 7042(5) | 1922(4) | 19(2) |
| O(54) | 4333(8) | 5562(5) | 2444(5) | 22(2) |
| O(55) | 5419(7) | 5160(5) | 3358(4) | 16(2) |
| O(56) | 6518(8) | 6128(5) | 3999(4) | 18(2) |
| O(57) | 8222(8) | 7781(5) | 3578(4) | 18(2) |
| O(58) | 7015(8) | 8005(5) | 2614(4) | 19(2) |
| O(59) | 6055(7) | 8609(5) | 1609(4) | 16(2) |
| O(60) | 5862(8) | 7383(5) | 1395(4) | 18(2) |
| O(61) | 4374(7) | 7148(4) | 663(4)  | 14(2) |
| O(62) | 4586(8) | 5980(5) | 1305(5) | 22(2) |
| O(63) | 4635(8) | 4651(5) | 1545(4) | 18(2) |
| O(64) | 6155(7) | 4726(5) | 2327(4) | 16(2) |
| O(65) | 6547(8) | 3917(5) | 3349(4) | 18(2) |
| O(66) | 7325(8) | 4879(5) | 3753(5) | 21(2) |
| O(67) | 8422(7) | 5565(5) | 4418(4) | 18(2) |
| O(68) | 8195(7) | 6467(5) | 3461(4) | 16(2) |
| O(69) | 9785(7) | 6884(5) | 1354(4) | 16(2) |
| O(70) | 8080(7) | 6356(5) | 1214(4) | 14(2) |

|       |           |         |         |       |
|-------|-----------|---------|---------|-------|
| O(71) | 8140(8)   | 5424(5) | 402(5)  | 19(2) |
| O(72) | 8194(7)   | 5180(5) | 1655(4) | 14(2) |
| O(73) | 10040(7)  | 4665(5) | 2210(4) | 17(2) |
| O(74) | 9078(7)   | 5950(4) | 2148(4) | 13(2) |
| O(75) | 9011(8)   | 5265(5) | 3206(4) | 18(2) |
| O(76) | 8082(7)   | 4464(5) | 2682(4) | 16(2) |
| O(77) | 6411(8)   | 5137(5) | 1163(4) | 18(2) |
| O(78) | 6285(7)   | 6324(5) | 729(4)  | 17(2) |
| O(79) | 7739(7)   | 7602(5) | 1538(4) | 15(2) |
| O(80) | 8821(7)   | 7144(5) | 2506(4) | 16(2) |
| P(1)  | 11097(3)  | 1348(2) | 2459(2) | 14(1) |
| P(2)  | 6450(3)   | 6257(2) | 2493(2) | 15(1) |
| Ag(1) | 14790(1)  | 1482(1) | 3063(1) | 32(1) |
| Ag(2) | 4157(1)   | 7826(1) | 9562(1) | 27(1) |
| Ag(3) | 7433(1)   | 1257(1) | 1791(1) | 26(1) |
| Ag(4) | 2755(1)   | 6271(1) | 1854(1) | 31(1) |
| Ag(5) | 10165(1)  | 6392(1) | 3029(1) | 29(1) |
| Ag(6) | 8660(1)   | 2437(1) | 9312(1) | 27(1) |
| Ag(7) | 9667(1)   | 3647(1) | 3113(1) | 31(1) |
| Ag(8) | 7739(1)   | 4026(1) | 1748(1) | 34(1) |
| N(1S) | 15893(11) | 568(7)  | 2861(6) | 29(3) |
| C(1S) | 16449(13) | 104(8)  | 2749(8) | 28(4) |
| C(2S) | 17186(12) | -521(8) | 2631(7) | 23(4) |
| N(2S) | 2076(10)  | 5552(6) | 1358(6) | 23(3) |
| C(3S) | 1416(12)  | 5392(8) | 1169(7) | 21(4) |
| C(4S) | 629(12)   | 5173(8) | 868(7)  | 25(4) |
| N(3S) | 10246(9)  | 1824(6) | 9289(5) | 17(3) |
| C(5S) | 11015(12) | 1465(7) | 9242(7) | 20(3) |
| C(6S) | 12066(11) | 948(7)  | 9214(7) | 17(3) |
| N(4S) | 10669(12) | 7008(7) | 3701(7) | 36(4) |

|        |           |         |          |       |
|--------|-----------|---------|----------|-------|
| C(7S)  | 11197(13) | 7273(8) | 3892(8)  | 27(4) |
| C(8S)  | 11894(13) | 7587(8) | 4165(8)  | 27(4) |
| N(5S)  | 10506(10) | 4114(6) | 3712(6)  | 22(3) |
| C(10S) | 10988(13) | 5069(8) | 4247(8)  | 28(4) |
| C(9S)  | 10730(13) | 4498(8) | 3936(8)  | 26(4) |
| N(6S)  | 6324(10)  | 2173(6) | 1979(6)  | 25(3) |
| C(11S) | 5794(12)  | 2636(7) | 2126(7)  | 19(3) |
| C(12S) | 5121(11)  | 3239(7) | 2343(7)  | 18(3) |
| N(7S)  | 1497(11)  | 7116(7) | 2125(6)  | 30(3) |
| C(13S) | 950(12)   | 7604(8) | 2249(7)  | 22(4) |
| C(14S) | 283(14)   | 8250(9) | 2371(8)  | 34(4) |
| N(8S)  | 7872(12)  | 1748(7) | 8830(7)  | 36(4) |
| C(15S) | 7175(11)  | 1534(7) | 8739(7)  | 16(3) |
| C(16S) | 6310(12)  | 1277(8) | 8634(7)  | 24(4) |
| N(9S)  | 7603(10)  | 3300(6) | 9662(6)  | 24(3) |
| C(17S) | 7009(12)  | 3726(7) | 9823(7)  | 19(3) |
| C(18S) | 6187(13)  | 4297(8) | 10010(8) | 29(4) |
| N(10S) | 15414(13) | 2161(8) | 3592(7)  | 46(4) |
| C(19S) | 16010(14) | 2308(9) | 3843(8)  | 33(4) |
| C(20S) | 16806(14) | 2532(9) | 4190(8)  | 33(4) |
| N(11S) | 6711(10)  | 499(6)  | 1394(6)  | 24(3) |
| C(21S) | 6100(11)  | 344(7)  | 1131(6)  | 15(3) |
| C(22S) | 5323(13)  | 120(8)  | 835(7)   | 26(4) |
| N(12S) | 11346(10) | 5520(6) | 2773(6)  | 25(3) |
| C(23S) | 11917(13) | 5049(8) | 2689(8)  | 30(4) |
| C(24S) | 12609(13) | 4425(8) | 2548(8)  | 30(4) |
| N(13S) | 5192(10)  | 6903(6) | 9325(6)  | 25(3) |
| C(25S) | 5948(13)  | 6519(8) | 9259(7)  | 24(4) |
| C(26S) | 6882(12)  | 5997(7) | 9193(7)  | 19(3) |
| N(14S) | 2712(10)  | 8530(6) | 9712(6)  | 24(3) |

|        |           |          |          |       |
|--------|-----------|----------|----------|-------|
| C(27S) | 2033(12)  | 8914(7)  | 9817(7)  | 18(3) |
| C(28S) | 1097(12)  | 9404(7)  | 9969(7)  | 19(3) |
| N(15S) | 8597(11)  | 3771(7)  | 872(6)   | 31(3) |
| C(29S) | 9308(11)  | 3602(7)  | 528(7)   | 15(3) |
| C(30S) | 10216(12) | 3385(8)  | 70(7)    | 25(4) |
| N(16S) | 5399(11)  | 8410(7)  | 10067(6) | 30(3) |
| C(31S) | 6219(13)  | 8088(8)  | 10052(7) | 24(4) |
| C(32S) | 7295(12)  | 7661(7)  | 10063(7) | 18(3) |
| N(17S) | 3166      | 8717(13) | 4517     | 28(4) |
| C(33S) | 3853      | 8772     | 4085     | 18(3) |
| C(34S) | 4602      | 8818     | 3614     | 18(3) |
| N(18S) | 4585      | 1471     | 4726     | 28(4) |
| C(35S) | 4001      | 1794     | 4833     | 18(3) |
| C(36S) | 2938      | 2285     | 4941     | 18(3) |
| N(19S) | 8         | 8985     | 4737     | 28(4) |
| C(37S) | -843      | 9038     | 4468     | 18(3) |
| C(38S) | -1720     | 9195     | 4153     | 18(3) |
| Ag(1D) | 9972(2)   | 3391(1)  | 4894(1)  | 53(1) |
| Ag(2D) | 6868(2)   | 4330(1)  | 4826(1)  | 49(1) |
| Ag(3D) | 5787(2)   | 539(1)   | 4499(2)  | 57(1) |
| Ag(4D) | 1554(3)   | 9111(1)  | 5038(2)  | 63(1) |
| N(1AN) | 3980(30)  | 4197(18) | 4477(17) | 35(4) |
| O(1AN) | 5250(20)  | 4127(14) | 4560(13) | 35(4) |
| O(2AN) | 3667      | 4701     | 4751     | 35(4) |
| O(3AN) | 4150(20)  | 3775(15) | 4115(14) | 35(4) |
| O(1W)  | 8416      | 3873     | 4898     | 35(4) |
| O(2W)  | 5686      | -380     | 4130     | 35(4) |
| O(3W)  | 2773      | 9304     | 5084     | 35(4) |

**Table S5.** Ambient-Temperature Air Oxidation of CEES in 2,2,2-Trifluoroethanol Catalyzed by Selected Materials.<sup>a</sup>

| catalyst                                                                                           | mol of POM, 10 <sup>-5</sup> | mol of Ag salt, 10 <sup>-5</sup> | TON <sup>b</sup>  |
|----------------------------------------------------------------------------------------------------|------------------------------|----------------------------------|-------------------|
| None                                                                                               | NA                           | NA                               | 0 <sup>c</sup>    |
| Ag <sub>5</sub> I                                                                                  | 2.30                         | NA                               | 2300              |
| Na <sub>5</sub> PV <sub>2</sub> Mo <sub>10</sub> O <sub>40</sub>                                   | 2.80                         | NA                               | 0 <sup>c</sup>    |
| AgCl                                                                                               | NA                           | 3.35                             | 0 <sup>c</sup>    |
| Na <sub>5</sub> PV <sub>2</sub> Mo <sub>10</sub> O <sub>40</sub> + AgCl                            | 2.90                         | 14.5                             | 0 <sup>c</sup>    |
| Ag <sub>5</sub> PV <sub>2</sub> W <sub>10</sub> O <sub>40</sub>                                    | 2.45                         | NA                               | 0 <sup>c</sup>    |
| Ag <sub>9</sub> P <sub>2</sub> V <sub>3</sub> W <sub>15</sub> O <sub>62</sub>                      | 2.50                         | NA                               | 0 <sup>c</sup>    |
| AgNO <sub>3</sub> <sup>d</sup>                                                                     | NA                           | 2.82                             | 9.29 <sup>e</sup> |
| Na <sub>3</sub> VO <sub>4</sub> <sup>f</sup>                                                       | NA                           | NA                               | 0 <sup>c</sup>    |
| Na <sub>2</sub> MoO <sub>4</sub> •2H <sub>2</sub> O <sup>g</sup>                                   | NA                           | NA                               | 0 <sup>c</sup>    |
| Na <sub>3</sub> VO <sub>4</sub> + Na <sub>2</sub> MoO <sub>4</sub> •2H <sub>2</sub> O <sup>g</sup> | NA                           | NA                               | 0 <sup>c</sup>    |

<sup>a</sup>Reaction conditions: 0.275 M CEES (~20 mol CEES:1 mol catalyst) in 2,2,2-trifluoroethanol at room-temperature for 7.1 days. Reactions were quantified by GC (5% phenyl methyl siloxane column) using 1,3-dichlorobenzene as an internal standard. <sup>b</sup>Turnovers = [(mols of CEESO)/(mole of surface accessible Ag<sub>5</sub>I)]. <sup>c</sup>Below the detectable limit. <sup>d</sup>Homogeneous reaction where the catalyst was soluble. <sup>e</sup>Turnovers = [(mol of CEESO)/(mol of catalyst)]. <sup>f</sup>Reaction conditions: 0.172 M CEES (~20 mol CEES:1 mol catalyst) in 2,2,2-trifluoroethanol at room temperature for 10.7 days.

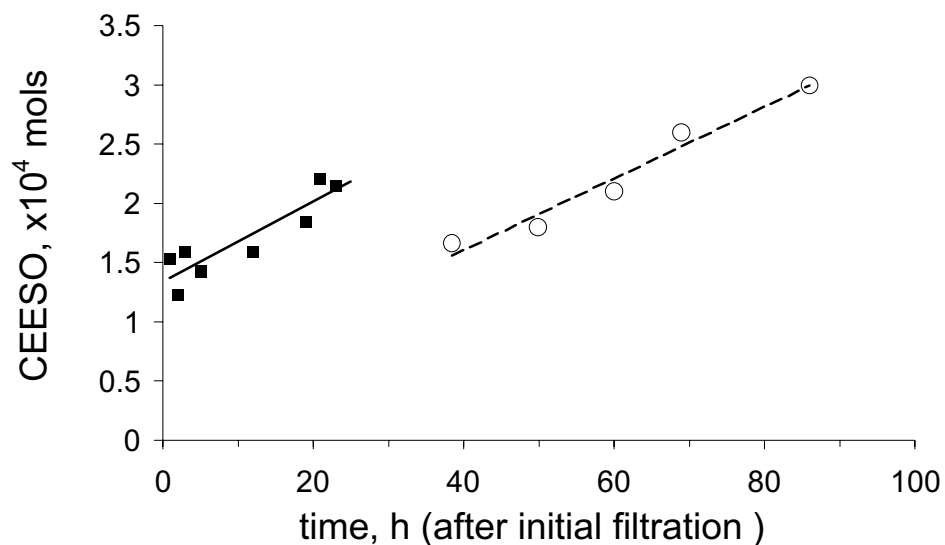

**Figure S1.** Continued oxidation of CEES to CEESO after isolation and resuspension of the heterogeneous catalyst. The solid line is a plot of CEESO formation after  $\text{Ag}_3\text{I}$  was removed from the initial reaction mixture, isolated and resuspended in a reaction vial with a fresh CEES solution. The dashed line is a plot of CEESO formation after  $\text{Ag}_3\text{I}$  was isolated a second time and resuspended in a another reaction vial with a fresh CEES solution. The catalytic activities of the clear filtrates from both trials were monitored. None showed any catalytic activity whatsoever. Reaction conditions: CEES was 0.275 M (~20 mol CEES : 1 mol catalyst) in 2,2,2-trifluoroethanol at 40 °C (higher temperature used to increase rate of reaction). Reactions were quantified by GC (5% phenyl methyl siloxane column) using 1,3-dichlorobenzene as an internal standard.

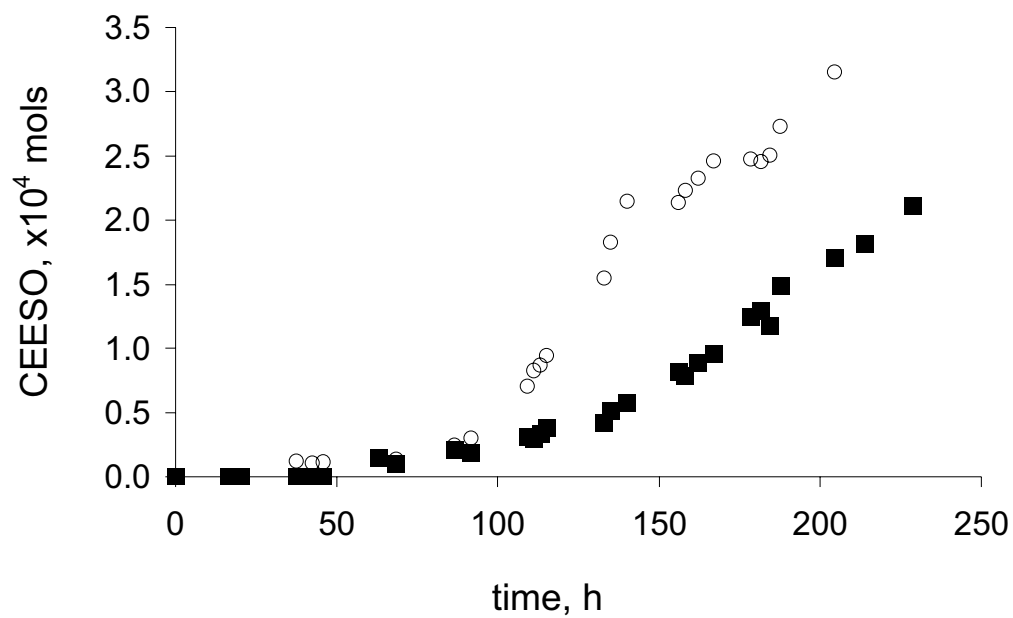

**Figure S2.** Reaction profile for the ambient-temperature air oxidation of CEES (○) to CEESO catalyzed by Ag<sub>3</sub>I in 2,2,2-trifluoroethanol and its inhibition by added DMSO (■).



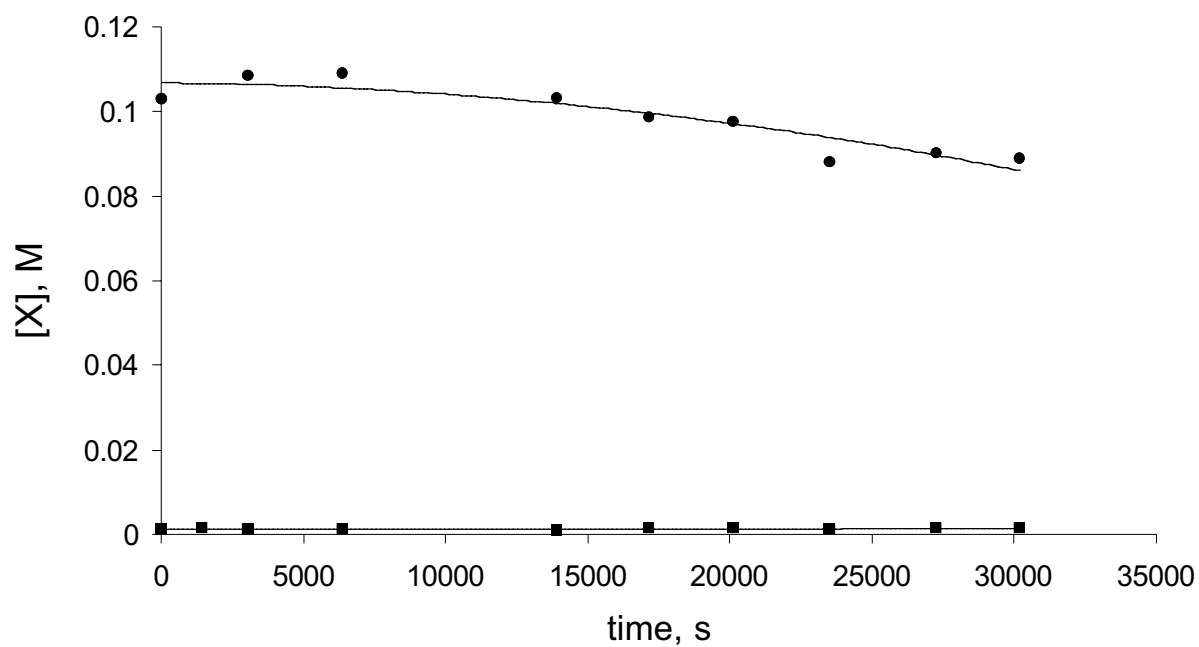

**Figure S3.** Absorption of CEES onto the solid catalyst Ag<sub>5</sub>1. Concentrations of CEES (●) and the hydrolysis product ( $\text{CH}_3\text{CH}_2\text{SCH}_2\text{CH}_2\text{OH}$  (■)) are plotted versus time. After 8.4 hours,  $5.26 \times 10^{-5}$  mols of CEES was absorbed onto  $3.53 \times 10^{-5}$  mols of catalyst. No CEESO was detected.

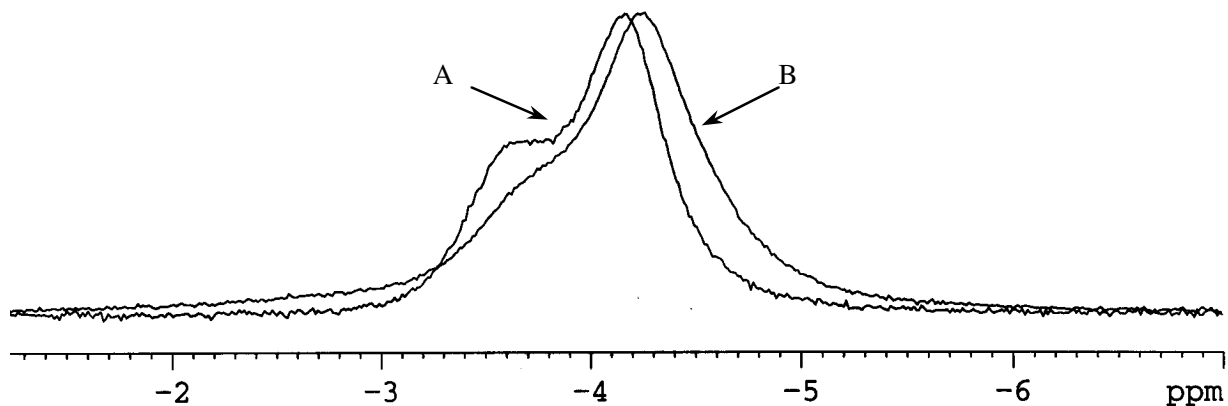

**Figure S4.** Determination of CEESO Bound to the Catalyst by  $^{31}\text{P}$  Solid State NMR of  $\text{Ag}_5\text{I}$  Before and After catalysis. A) catalyst before reaction, B) catalyst after reaction. The spectra were collected on a Bruker DSX400 NMR spectrometer operating at xxxx T, using an MAS probe. The following parameters were implemented: single pulse excitation, 4.5  $\mu\text{s}$  pulse length (p1), x  $\mu\text{s}$  dead time after pulse, 10 s repetition delay (d1), 32 averages, 4096 complex data points in FID, spectral width of 8100 Hz, and a sender frequency of 161.86 MHz. A x-mm (outer diameter) rotor was used and samples were referenced to the external standard ammonium dihydrogen phosphate (ADP) at 0 ppm. The observed shoulder for the spectra is due to the presence of two crystallographically inequivalent POMs within the unit cell of the crystal ( $Z = 2$ ).

## Experimental Section

**Synthesis and Characterization of  $\text{Ag}_5\text{PV}_2\text{Mo}_{10}\text{O}_{40} \cdot \text{Na}_5\text{PV}_2\text{Mo}_{10}\text{O}_{40} \cdot x\text{H}_2\text{O}$ .**  $\text{Na}_5\text{PV}_2\text{Mo}_{10}\text{O}_{40} \cdot x\text{H}_2\text{O}$  was synthesized and purified according to the literature procedure (Pettersson, L.; Andersson, I.; Selling, A.; Grate, G. H. *Inorg. Chem.* 1994, 33, 982-993).  $\text{Na}_5\text{PV}_2\text{Mo}_{10}\text{O}_{40}$  (39.5 g, 21.4 mmol) was dissolved in 100 mL of distilled water at room temperature. Any undissolved POM was removed by filtration over a medium fritted funnel to yield a bright red-orange solution (0.214 M POM). An aliquot of this solution (40 mL, 8.55 mmol POM) was removed to which  $\text{AgNO}_3$  (7.26g, 42.7 mmol) was added. Addition of  $\text{AgNO}_3$  resulted in immediate precipitation of a red-orange amorphous powder. The precipitate was removed by suction filtration over a medium fritted funnel. The product was washed three times with room temperature water, three times with ether and then allowed to dry on the funnel (yield 5.07 g, 26.1% based on  $\text{Na}_5\text{PV}_2\text{Mo}_{10}\text{O}_{40}$ ). TGA and DSC data showed  $\text{Ag}_5\mathbf{1}$  was stable up to 832 °C. Water molecules of solvation (11 per POM, ~8.4 % weight loss) were driven off between 36 to 450 °C. Anal. Calcd. (found) for  $\text{Ag}_5\text{PV}_2\text{Mo}_{10}\text{O}_{40} (\text{NaNO}_3)_{0.35}$ . Anal. Calcd. (found) for  $\text{Ag}_5\text{PV}_2\text{Mo}_{10}\text{O}_{40}$  Ag, 23.74 (23.99); Mo, 42.82 (44.30); P, 1.36 (1.29); V, 4.50 (4.80) FTIR (KBr, 1100-400  $\text{cm}^{-1}$ ): 1073 (sh), 1062 (m), 1048 (m), 946 (s), 863 (m), 777 (vs)  $\text{cm}^{-1}$ . SSA = 0.93  $\text{m}^2 \text{g}^{-1}$ . X-ray quality crystals were obtained by diffusion of diethyl ether into an acetonitrile solution of  $\text{Ag}_5\mathbf{1}$  at 25 °C.

**Ambient-Temperature Air Oxidation of CEES in 2,2,2-Trifluoroethanol Catalyzed by Selected Materials.** A stock solution of CEES (0.275 M) was prepared in 2,2,2-trifluoroethanol with 1,3-dichlorobenzene added as an internal standard. The different catalysts were placed in 18-mL glass vials fitted with polytetrafluoroethylene (PTFE) septa and screw tops. Aliquots (2 mL) of CEES solution were added to each vial and each reaction was allowed to proceed for 11.9 days at room temperature with stirring (400 rpm). All reactions were monitored by GC.

**Determination of the Effect on Catalysis from solvated  $\text{H}_2\text{O}$  within  $\text{Ag}_5\mathbf{1}$ .** A sample of  $\text{Ag}_5\mathbf{1}$  was dried under vacuum at 150 °C for 2 hours. TGA confirmed the loss of approximately half the solvated water molecules as compared with the thermogram of the original  $\text{Ag}_5\mathbf{1}$ . The dried catalyst was suspended in 2 mL of a CEES solution (0.178 M CEES in 2,2,2-trifluoroethanol with 1,3-dichlorobenzene added as an internal standard), stirred for 10.7 days, and CEESO and CEES were quantified by GC. The solvated water molecules did not effect the catalytic activity of  $\text{Ag}_5\mathbf{1}$ .

**Confirmation of Reaction Stoichiometry.**  $\text{Ag}_5\mathbf{1}$  (0.3008 g,  $1.33 \times 10^{-4}$  mol) was placed in a 25-mL Schlenk flask with 5.0 mL of a 0.2576 M solution of CEES in 2,2,2-trifluoroethanol. The flask was connected to a modified manometer and the system was purged with oxygen. The flask was then submerged in a 40 °C water bath and allowed to thermally equilibrate. The volume of consumed oxygen versus time was recorded. The system was allowed to react for 36 hrs.

**Determination of Mass Balance for Oxidation of CEES to CEESO Catalyzed by  $\text{Ag}_5\mathbf{1}$ .** Reaction conditions: 2 mL aliquot of a 0.172 M CEES solution in 2,2,2-trifluoroethanol with 1,3-dichlorobenzene added as an internal standard for quantification by GC.  $\text{Ag}_5\mathbf{1}$  was suspended in the CEES solution and allowed to catalyze the oxidation at room temperature with air in an 18 mL vial fitted with a polytetrafluoroethylene (PTFE) septum and stirred at 400 rpm for 10.7 days. The ratio of CEES:CEESO after the reaction was 1:1, indicating CEESO to be the only product.

**Determination of Radical vs. Non-Radical Mechanism of CEES Oxidation catalyzed by  $\text{Ag}_5\mathbf{1}$  via BHT as a Radical Trap.** A solution of 0.172 M CEES was prepared in 2,2,2-trifluoroethanol with 1,3-dichlorobenzene added as an internal standard.  $\text{Ag}_5\mathbf{1}$  ( $1.74 \times 10^{-5}$  mol) was suspended in 2 mL aliquots of the CEES solution and placed in 18-mL glass vials fitted with polytetrafluoroethylene (PTFE) septa and screw tops. BHT ( $2.45 \times 10^{-5}$  mol) was added after 114 hours and CEESO production was observed (5.3 TON). The reaction was allowed to continue and CEESO continued to evolve at a similar rate to the reactions where no BHT was added.

**Confirmation that the Solid is the Active Catalyst by Filtration.**  $\text{Ag}_5\mathbf{1}$  (0.292 g,  $1.29 \times 10^{-4}$  mol) was added to a glass vial fitted with a PTFE septum to which 4.5 mL of a 0.257 M solution of CEES in 2,2,2-trifluoroethanol was added. The reaction mixture was purged with  $\text{O}_2$ , placed in a thermostated water bath at 40 °C, and the suspension was stirred at 200 rpm. The reaction was monitored for 43 h during which aliquots were removed and analyzed by GC. After 43 h, the vial was removed from the water bath and the contents centrifuged and then filtered through a pipette that had been tightly packed with cellulose. The clear, very faint yellow supernatant was placed in a new vial fitted with a PTFE septum. The contents and vial were then purged with  $\text{O}_2$ , placed back into the 40 °C water bath, and stirred at 200 rpm. The recovered yellow-orange powder (POM) was mixed with 5.0 mL of fresh 0.257 M CEES solution in a second vial. The vial was fitted with a PTFE septum, and the vial and contents purged with  $\text{O}_2$ . The vial was then placed back into the 40 °C water bath, and the contents stirred at 200 rpm. All reactions were monitored by GC. The resuspended POM was allowed to react for 40 h, after which time the reaction vessel was removed from the water bath and the contents centrifuged and then filtered through a pipette that had been tightly packed with cellulose. The clear, very faint green supernatant was placed in a new vial, fitted with a PTFE septum and purged with  $\text{O}_2$ . The reaction mixture was then put back into the 40 °C water bath, and stirred at 200 rpm. The recovered yellow-green powder (POM) was placed into a vial which contained 5.0 mL of fresh 0.257 M CEES solution. The vial was fitted with a new PTFE septum and the contents and vial purged with  $\text{O}_2$ . The vial was then placed back into the 40 °C water bath and the reaction stirred at 200 rpm. GC was used to monitor all reactions.

**Spectroscopic Assessment of  $\text{Ag}_5\mathbf{1}$  Solubility.**  $\text{Ag}_5\mathbf{1}$  (0.146 g,  $6.43 \times 10^{-5}$  mol) was suspended in the reaction mixture, containing TFE (2.0 mL), CEES (0.1 mL) and 1,3-dichlorobenzene (25  $\mu\text{L}$ ) as a reference. The mixture was stirred at 400 rpm for a 15 min and then centrifuged, followed by filtering through a pipette packed with cellulose. The clear supernatant was collected and the partially reacted  $\text{Ag}_5\mathbf{1}$  was resuspended in a fresh reaction mixture. After stirring for 30 min, the reaction mixture was again centrifuged, followed by filtering through a cellulose packed pipette. This process was repeated 11 times at room temperature, at 40 °C, and at different stirring times (varying from 15 min to 18 h). At the conclusion, the collected supernatants (~20 mL) were combined, concentrated by roto-evaporation to a volume of 3 mL and filtered through a fine fritted funnel. The resulting solution was clear and

very faintly yellow. An aliquot was removed and placed in an IR solution cell fitted with AgBr windows and a 0.015 mm Teflon spacer. Examination of the IR spectrum indicated no POM (absence of the M-O-M ( $797\text{ cm}^{-1}$ ) and P-O ( $1046\text{ cm}^{-1}$ ) bands). The solution (1 mL aliquot) was placed in a 5-mm NMR tube with a small amount of  $\text{CD}_3\text{CN}$  to achieve solvent lock. The sample was placed in the NMR and 3300 scans were acquired. No vanadium was detected. To insure that any vanadium present was oxidized to diamagnetic  $\text{d}^0\text{V(V)}$  (reduced vanadium is paramagnetic and therefore would cause line-broadening and thus, no NMR signal) the sample was removed and bromine was added to the NMR tube. The sample was shaken vigorously and placed back into the NMR. Again, 3300 scans were acquired, and no vanadium was detected. Finally, the 3 mL of concentrated solution was again roto-evaporated until only a dark, oily substance remained. This was placed in an IR solution cell, fitted with AgBr windows and analyzed by IR. The spectrum did not display any bands associated with the  $\text{Ag}_5\mathbf{1}$  catalyst.

**Inhibition of the Reaction by DMSO.**  $\text{Ag}_5\mathbf{1}$  ( $0.104\text{ g}$ ,  $4.58 \times 10^{-5}\text{ mol}$ ) was suspended in 10 mL of a 0.185 M solution of CEES in 2,2,2-trifluoroethanol which had been placed in a glass vial with a PTFE septum. DMSO ( $0.14\text{ mL}$ ,  $2.0\text{ mmol}$ , used as a model for CEESO) was added to the system, and it was allowed to react under ambient conditions. A similar reaction (identical experimental conditions but without addition of DMSO) was run in parallel (see Figure S2). After 48 and 72 h, additional aliquots of DMSO ( $0.14\text{ mL}$ ,  $2.0\text{ mmol}$ ) were added to the reaction mixture. Both reactions were monitored using quantitative GC.

**Substrate Adsorption onto the Catalyst.** A stock solution of CEES ( $0.1047\text{ M}$ ) was prepared in 2,2,2-trifluoroethanol with 1,3-dichlorobenzene added as an internal standard. The CEES solution was placed in a 18-mL glass vial fitted with polytetrafluoroethylene (PTFE) septum and screw top. The solution was stirred at 400 rpm at room temperature for 2.6 hours, during which aliquots were removed and analyzed by GC.  $\text{Ag}_5\mathbf{1}$  ( $0.130\text{ g}$ ,  $5.26 \times 10^{-5}\text{ mol}$ ) was then added to the stirring solution and the concentrations of CEES and  $\text{CH}_3\text{CH}_2\text{SCH}_2\text{CH}_2\text{OH}$  (hydrolysis product of CEES) were monitored by GC. After 8.4 hours,  $5.26 \times 10^{-5}\text{ mols}$  of CEES was absorbed onto  $3.53 \times 10^{-5}\text{ mols}$  of catalyst. After reaction, the green (reduced form) catalyst was removed from the reaction mixture by suction filtration, suspended in TFE and washed for an hour, isolated and then dried *in vacuo*. This process was repeated three times, with the final *in vacuo* drying done overnight. Solid FTIR (5% KBr) analysis of the catalyst revealed new bands present at  $3300\text{ cm}^{-1}$  (C – H stretching) and  $1100\text{ cm}^{-1}$  (likely sulfoxide stretch) as well as the intact POM skeleton.

X-ray crystallography of  $\text{Ag}_5\mathbf{1}$  after reaction failed to yield a viable structure of CEESO bound to the catalyst. However, the X-ray data indicated CEESO molecules proximal to the  $\text{Ag(I)}$  centers. Elemental analysis confirmed the presence of S on the recovered catalyst.

Calculation of Surface Accessible  $\text{Ag}_5\mathbf{1}$ .

1. What is the size of the  $\text{Ag}_5\mathbf{1}$  catalyst particles?

Assume spherical catalyst particles

Each  $\text{Ag}_5\mathbf{1}$  unit has a surface area of  $1.2\text{ nm}^2$

based on analysis of the packing diagram for crystalline  $\text{Ag}_5\mathbf{1}$ .

Spherical catalyst particles have  $0.93\text{ m}^2\text{ g}^{-1}$  surface area from BET analysis

Density of  $\text{Ag}_5\mathbf{1}$  from X - ray crystallography =  $3 \bullet 10^6\text{ g m}^{-3}$

$$\text{Volume (v)} = \frac{4}{3}\pi r^3$$

$$\text{Surface (s)} = 4\pi r^2$$

$$\text{Density (d)} = \frac{\text{mass (m)}}{\text{volume (v)}}$$

$$\text{Specific Surface Area (SSA)} = \frac{s}{m} = \frac{4\pi r^2}{\frac{4}{3}\pi r^3 d} = \frac{3}{rd}$$

$$r = \frac{3}{\text{SSA} \times d} = \frac{3}{0.93\text{ m}^2\text{ g}^{-1} \times 3 \bullet 10^6\text{ gm}^{-3}} = \frac{1}{10^6}\text{ m} = \sim 1\text{ }\mu\text{m}$$

thus, diameter of a  $\text{Ag}_5\mathbf{1}$  catalyst sphere = 2000 nm

2. How many Ag<sub>5</sub>**1** molecules are on the surface of the 1000 nm radius sphere?

$$n_s = \frac{s}{1.2 \text{ nm}^2} = \frac{4\pi r^2}{1.2 \text{ nm}^2} = \frac{4\pi(1000 \text{ nm})^2}{1.2 \text{ nm}^2} = 1.0 \bullet 10^7 \text{ molecules on the surface}$$

3. How many Ag<sub>5</sub>**1** molecules are in a 1000 nm radius sphere?

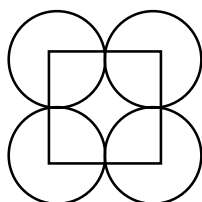

x = distance between catalytic  
spheres =  $\sqrt{1.2 \text{ nm}^2} = 1.2 \text{ nm}$

$$n_\theta = \frac{\text{volume}}{x^3} = \frac{\frac{4}{3}\pi r^3}{(1.2 \text{ nm})^3} = \frac{\frac{4}{3}\pi(1000 \text{ nm})^3}{(1.2 \text{ nm})^3} = 2.4 \bullet 10^9 \text{ Ag}_5\mathbf{1} \text{ molecules in the } 1 \mu\text{m sphere}$$

4. What percentage of Ag<sub>5</sub>**1** molecules is on the surface?

$$\frac{n_s}{n_\theta} \times 100 = 0.41\% = \text{Ag}_5\mathbf{1} \text{ molecules are on the surface}$$

Thus, if there are 9.6 observed turnovers per mole of POM molecule and only 0.42% of these POMs are surface accessible then  $(9.6/0.0041) = \sim 2300$  turnovers per surface exposed Ag<sub>5</sub>**1** molecule. The surface area of Ag<sub>5</sub>**1** after catalysis was measured (in duplicate) to be 0.93 m<sup>2</sup> g<sup>-1</sup>.
